# Supplementary material for: Unlocking the effect of Zn2+ on crystal structure, optical properties, and photocatalytic degradation of perfluoroalkyl substances (PFAS) of Bi2WO6
Source: Royal Society of Chemistry journal article supplement (doi:10.1039/d3ew00430a), 2023-01-01
Supplement: d3ew00430a1.pdf [file d3ew00430a1.pdf]

## ELECTRONIC SUPPLEMENTARY INFORMATION

# Unlocking the Effect of Zn<sup>2+</sup> on Crystal Structure, Optical Properties, and Photocatalytic Degradation of Perfluoroalkyl Substances (PFAS) of Bi<sub>2</sub>WO<sub>6</sub>

Mirabbos Hojamberdiev<sup>1,\*</sup>, Ana Laura Larralde<sup>2,3</sup>, Ronald Vargas<sup>4,5</sup>, Lorean Madriz<sup>4,5</sup>, Kunio Yubuta<sup>6</sup>, Lokesh Koodlur Sannegowda<sup>7</sup>, Ilona Sadok<sup>8</sup>, Agnieszka Krzyszczak-Turczyn<sup>8,9</sup>, Patryk Oleszczuk<sup>9</sup>, and Bożena Czech<sup>9,\*</sup>

<sup>1</sup>*Institut für Chemie, Technische Universität Berlin, Straße des 17. Juni 135, 10623 Berlin, Germany*

<sup>2</sup>*Consejo Nacional de Investigaciones Científicas y Técnicas (CONICET), Buenos Aires, Argentina*

<sup>3</sup>*Instituto Nacional de Tecnología Industrial, Avenida General Paz 5445, San Martín (B1650WAB), Buenos Aires, Argentina*

<sup>4</sup>*Instituto Tecnológico de Chascomús (INTECH), Consejo Nacional de Investigaciones Científicas y Técnicas (CONICET), Avenida Intendente Marino, Km 8,2, Chascomús (B7130IWA), Provincia de Buenos Aires, Argentina*

<sup>5</sup>*Escuela de Bio y Nanotecnologías, Universidad Nacional de San Martín (UNSAM), Avenida Intendente Marino, Km 8,2, Chascomús (B7130IWA), Provincia de Buenos Aires, Argentina*

<sup>6</sup>*Department of Applied Quantum Physics and Nuclear Engineering, Kyushu University, Fukuoka 819-0395, Japan*

<sup>7</sup>*Department of Studies in Chemistry, Vijayanagara Sri Krishnadevaraya University, Cantonment, Vinayakanagara, Ballari, 583105, India*

<sup>8</sup>*Department of Chemistry, Institute of Biological Sciences, Faculty of Medicine, The John Paul II Catholic University of Lublin, Konstantynów 1J, 20-708 Lublin, Poland*

<sup>9</sup>*Department of Radiochemistry and Environmental Chemistry, Institute of Chemical Sciences, Faculty of Chemistry, Maria Curie-Skłodowska University in Lublin, 3 Maria Curie-Skłodowska Sq., 20-031 Lublin, Poland*

\*Corresponding authors: E-mail addresses: [bozena.czech@mail.umcs.pl](mailto:bozena.czech@mail.umcs.pl) (B. Czech) and [hmirabbos@gmail.com](mailto:hmirabbos@gmail.com) (M. Hojamberdiev)

### ***LC-QTOF/MS – instrumentation and analysis conditions***

A 1200 Series high-performance liquid chromatograph (Agilent Technologies) fitted with autosampler, quaternary pump with degasser, column thermostat and coupled to a tandem mass spectrometer (Agilent Technologies 6538 UHD Accurate Mass Q-TOF LC/MS) equipped with a dual ESI ion source was used. The analytical column used was the Zorbax Eclipse Plus C18 rapid resolution HT ( $2.1 \times 50$  mm,  $1.8 \mu\text{m}$ ). A 3-min linear gradient of aqueous solutions ( $5 \text{ mmol}\cdot\text{L}^{-1}$ ) of ammonium formate (A) and methanol (B) with an increase from 30% to 60% (3 min post-run at 30% B,  $0.3 \text{ mL}\cdot\text{min}^{-1}$  flow rate, and  $40^\circ\text{C}$  column temperature) was used in the chromatographic analyses. The analytes were ionized in the negative ion polarity mode. The temperature of an ion source gas (nitrogen) was  $280^\circ\text{C}$ , and the flow rate was  $9 \text{ L}\cdot\text{min}^{-1}$ . The capillary potential, fragmentor, and nebulizer pressure were set to 3500 V, 80 V, and 35 psi, respectively. The ions were acquired in a MS scan mode at 50-1000  $m/z$  with a scan rate of  $1 \text{ scan s}^{-1}$  (number of transients: 5975 and collision energy: 0 eV). Internal mass calibration was enabled using three reference mass ions (112.985587, 301.998139, and 1033.988109). The samples were analyzed in triplicate (injection volume:  $5 \mu\text{L}$ ). After the sample injection, the needle was washed with methanol. The quantification was performed on unprotonated ions  $[\text{M-H}]^-$ . For  $\text{PFH}_x\text{A}$ , an ion of  $m/z = 312.9748$  and the isotopically labeled internal standard ( $^{13}\text{C}_6$ - $\text{PFH}_x\text{A}$ ) ion of  $m/z = 318.9921$  were extracted, respectively. Data acquisition and analysis were performed using Agilent Mass Hunter software versions B.06.01 and B.07.00, respectively. For the quantitative analysis of  $\text{PFH}_x\text{A}$ , each sample was fortified with  $^{13}\text{C}_6$ - $\text{PFH}_x\text{A}$  ( $0.25 \text{ mg}\cdot\text{L}^{-1}$ ), vortexed, and passed through a  $0.22 \mu\text{m}$  polypropylene (PP) syringe filter (Bioanalytic, Gdańsk, Poland) into the PP chromatographic vial and analyzed using LC-QTOF/MS. An example of the extracted ion chromatograms is presented in Figure S1.

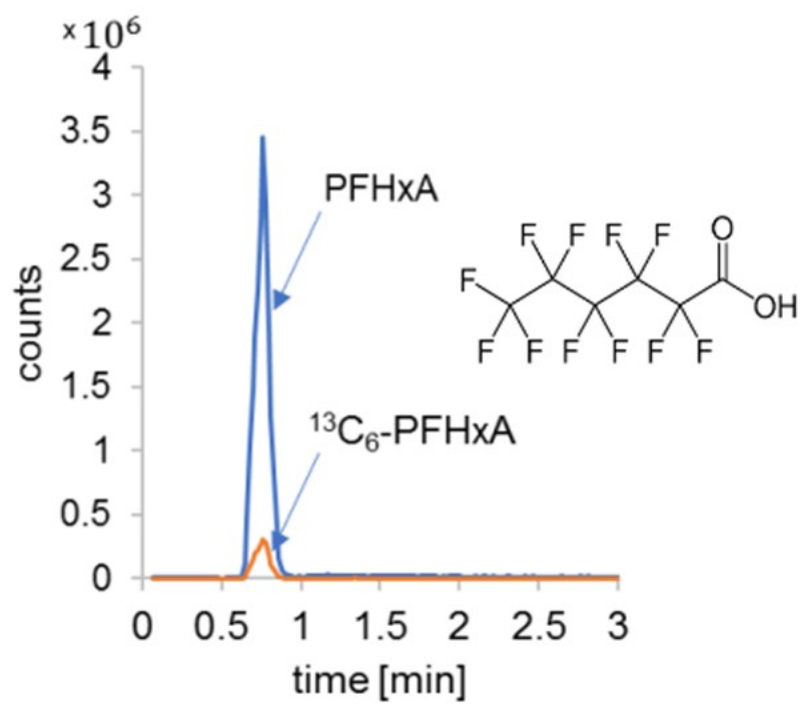

**Figure S1.** Extracted ion chromatograms of PFH<sub>x</sub>A and  $^{13}\text{C}_6$ -PFH<sub>x</sub>A.

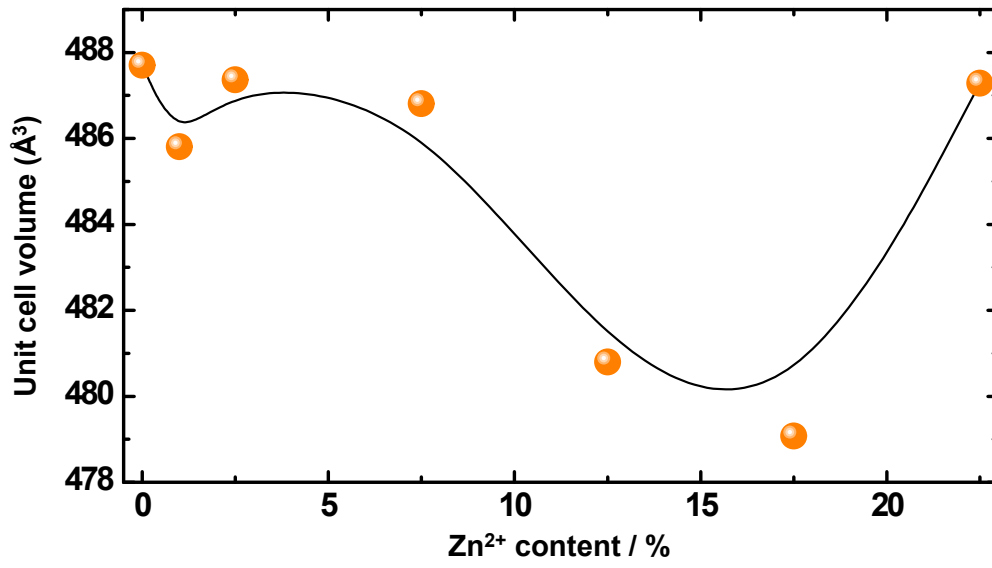

**Figure S2.** Unit cell volume of  $\text{Bi}_{2-x}\text{Zn}_x\text{WO}_{6+\delta}$  as a function of  $\text{Zn}^{2+}$  content.

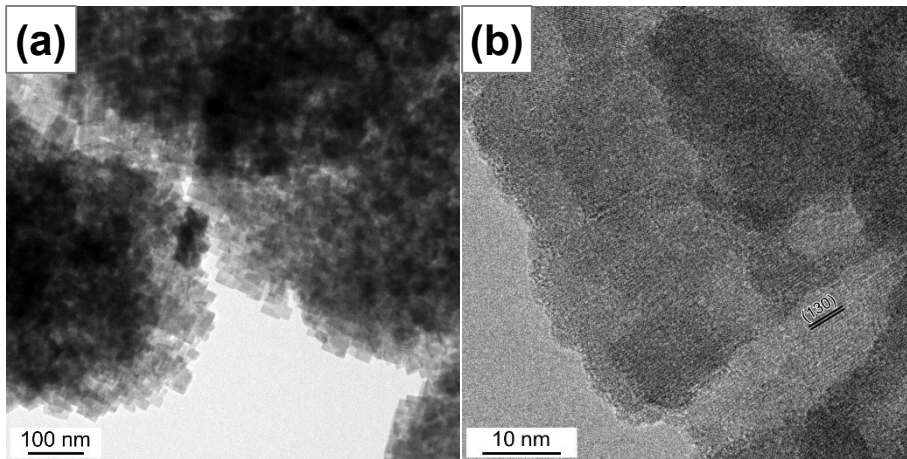

**Figure S3.** TEM (a) and HRTEM (b) images of Zn<sub>17.5</sub>.

**Table S1.** Comparative results of PFAS degradation.

| Conditions                                                             | Efficiency                                                                                   | Light source           | References                                                       |
|------------------------------------------------------------------------|----------------------------------------------------------------------------------------------|------------------------|------------------------------------------------------------------|
| Photo-Fenton process                                                   | 90% degradation and 53.2% defluorination after 5 h                                           | UV                     | <i>Chem. Eng. J.</i> , 2012, <b>184</b> , 156–162.               |
| In <sub>2</sub> O <sub>3</sub> porous nanospheres                      | 100% within 30 min                                                                           | UV                     | <i>Appl. Catal. B</i> , 2012, <b>125</b> , 350–357.              |
| BiOCl                                                                  | 59.3% defluorination after 3 h                                                               | UV                     | <i>Chem. Eng. J.</i> , 2017, <b>317</b> , 925–934.               |
| $\beta$ -Ga <sub>2</sub> O <sub>3</sub> nanoplates                     | 100% within 3 h                                                                              | UV (185 nm)            | <i>Appl. Catal. B</i> , 2013, <b>142–143</b> , 654–661.          |
| In <sub>2</sub> O <sub>3</sub>                                         | 100% decomposition of PFAS                                                                   | UV                     | <i>Chemosphere</i> , 2017, <b>189</b> , 717–729.                 |
| Fe/TNTs@AC                                                             | >90% decomposition of PFOA in 4 h, of which 62% was completely mineralized to F <sup>-</sup> | UV                     | <i>Water Res.</i> , 2020, <b>185</b> , 116219.                   |
| Iron nanoparticles (Fe <sup>0</sup> )                                  | 90±1% degradation after 2 h                                                                  | UV (pH=3.0)            | <i>J. Water Process. Eng.</i> , 2022, <b>46</b> , 102556.        |
| WO <sub>3</sub> /TiO <sub>2</sub> catalysts (0–5 wt% WO <sub>3</sub> ) | 4 %–26 % after 4 h                                                                           | UVA+Vis+O <sub>3</sub> | <i>Sci. Total Environ.</i> , 2022, <b>843</b> , 157006.          |
| Pb-doped TiO <sub>2</sub> coated with reduced graphene oxide           | 98% after 24 h                                                                               | UV                     | <i>Water Environ. Res.</i> , 2023, <b>95</b> , e10871.           |
| Hexagonal boron nitride in UVC/VUV system                              | >99% degradation of PFOA in 15 min and 65% degradation of PFOS in 1 h                        | UVC (254 nm)           | <i>Environ. Sci. Technol. Lett.</i> , 2023, <b>10</b> , 705–710. |
| Zn <sub>2.5</sub> -Bi <sub>2</sub> WO <sub>6</sub>                     | 57% degradation in 45 min                                                                    | Visible                | This study                                                       |
